# Supplementary material for: The Relationship Between White Blood Cell Counts and Pediatric Hypertension: A Prospective Cohort Study
Source: Research Square preprint supplement (doi:10.21203/rs.3.rs-7484387/v1), 2025-10-01
Supplement: Supplementary file 1 [file 21cf892e6fea64b6ca881d9a.docx]

| **Supplementary table 1. The difference of hemodynamic indexes for children under different levels of the variables for a cohort study** | | | | | | | | |
| --- | --- | --- | --- | --- | --- | --- | --- | --- |
| **Variables** | **Q1 vs Q2** | |  | **Q1 vs Q3** | |  | **Q1 vs Q4** | |
| **β（95%CIs）** | **P** |  | **β（95%CIs）** | **P** |  | **β（95%CIs）** | **P** |
| ***Systolic blood pressure, mmHg*** |  |  |  |  |  |  |  |  |
| **White blood cell count, 10^9/L** | <= 6.10 vs 6.10 - 7.20 | |  | <= 6.10 vs 7.20 - 8.40 | |  | <= 6.10 vs >8.40 | |
| Model1 | -0.88(-1.98,0.23) | 0.121 |  | -1.38(-2.55,-0.21) | 0.020 |  | -1.71(-2.83,-0.59) | 0.003 |
| Model2 | -0.88(-1.90,0.15) | 0.093 |  | -0.75(-1.83,0.33) | 0.174 |  | -1.08(-2.11,-0.05) | 0.040 |
| Model3 | -0.58(-1.54,0.38) | 0.239 |  | -0.26(-1.27,0.75) | 0.615 |  | -0.59(-1.56,0.38) | 0.231 |
| **Lymphocyte percentage, %** | <= 30.60 vs 30.60 - 36.10 | |  | <= 30.60 vs 36.10 - 41.90 | |  | <= 30.60 vs >41.90 | |
| Model1 | -0.13(-1.25,0.99) | 0.825 |  | 0.21(-0.91,1.32) | 0.719 |  | 1.17(0.04,2.3) | 0.042 |
| Model2 | -0.24(-1.27,0.79) | 0.653 |  | -0.21(-1.24,0.82) | 0.686 |  | 0.42(-0.61,1.46) | 0.424 |
| Model3 | 0.07(-0.9,1.03) | 0.895 |  | -0.11(-1.07,0.85) | 0.824 |  | 0.09(-0.89,1.06) | 0.862 |
| **Monocyte/Macrophage percentage, %** | <= 5.40 vs 5.40 - 6.90 | |  | <= 5.40 vs 6.90 - 8.60 | |  | <= 5.40 vs >8.60 | |
| Model1 | 1.6(0.5,2.7) | 0.005 |  | 1.25(0.12,2.39) | 0.031 |  | 2.23(1.11,3.34) | <0.001 |
| Model2 | 1.1(0.08,2.11) | 0.034 |  | 1.19(0.15,2.23) | 0.025 |  | 1.93(0.91,2.96) | <0.001 |
| Model3 | 0.94(-0.01,1.89) | 0.053 |  | 1.03(0.06,2.01) | 0.038 |  | 1.74(0.78,2.7) | <0.001 |
| **Lymphocyte count, 10^9/L** | <= 2.10 vs 2.10 - 2.55 | |  | <= 2.10 vs 2.55 - 3.00 | |  | <= 2.10 vs >3.00 | |
| Model1 | 1.21(0.1,2.33) | 0.033 |  | 0.46(-0.64,1.56) | 0.413 |  | -0.17(-1.33,0.99) | 0.773 |
| Model2 | 1.06(0.03,2.09) | 0.044 |  | 0.18(-0.83,1.19) | 0.724 |  | -0.15(-1.21,0.91) | 0.783 |
| Model3 | 0.92(-0.04,1.89) | 0.06 |  | 0.23(-0.72,1.17) | 0.635 |  | -0.05(-1.04,0.95) | 0.929 |
| **Monocyte/Macrophage count, 10^9/L** | <= 0.40 vs 0.40 - 0.50 | |  | <= 0.40 vs 0.50 - 0.60 | |  | <= 0.40 vs >0.60 | |
| Model1 | 0.28(-0.77,1.32) | 0.604 |  | 0.48(-0.81,1.78) | 0.463 |  | 0.63(-0.5,1.76) | 0.277 |
| Model2 | 0.37(-0.58,1.33) | 0.444 |  | 0.65(-0.54,1.84) | 0.282 |  | 1.13(0.09,2.17) | 0.033 |
| Model3 | 0.43(-0.46,1.33) | 0.342 |  | 0.64(-0.47,1.75) | 0.260 |  | 1.09(0.12,2.06) | 0.028 |
| **Neutrophil count, 10^9/L** | <= 3.12 vs 3.12 - 4.00 | |  | <= 3.12 vs 4.00 - 5.00 | |  | <= 3.12 vs >5.00 | |
| Model1 | -0.57(-1.67,0.53) | 0.311 |  | -1.17(-2.3,-0.04) | 0.043 |  | -1.95(-3.09,-0.8) | 0.001 |
| Model2 | 0.07(-0.95,1.09) | 0.886 |  | -0.31(-1.36,0.73) | 0.557 |  | -0.85(-1.91,0.21) | 0.116 |
| Model3 | 0.32(-0.63,1.28) | 0.507 |  | 0.27(-0.72,1.25) | 0.597 |  | -0.39(-1.38,0.61) | 0.443 |
| **Lymphocyte-Monocyte/macrophage ratio** | <= 3.86 vs 3.86 - 5.14 | |  | <= 3.86 vs 5.14 - 6.94 | |  | <= 3.86 vs >6.94 | |
| Model1 | 0.11(-1.02,1.24) | 0.847 |  | -0.69(-1.81,0.43) | 0.229 |  | -0.34(-1.46,0.77) | 0.546 |
| Model2 | -0.39(-1.43,0.64) | 0.459 |  | -1(-2.03,0.03) | 0.058 |  | -1.12(-2.14,-0.09) | 0.033 |
| Model3 | -0.43(-1.4,0.54) | 0.383 |  | -1.04(-2,-0.07) | 0.035 |  | -1.13(-2.09,-0.18) | 0.021 |
| **Neutrophil/lymphocyte ratio** | <= 1.19 vs 1.19 - 1.54 | |  | <= 1.19 vs 1.54 - 2.04 | |  | <= 1.19 vs >2.04 | |
| Model1 | -0.86(-1.99,0.26) | 0.132 |  | -1.08(-2.2,0.05) | 0.060 |  | -1.09(-2.21,0.03) | 0.057 |
| Model2 | -0.52(-1.55,0.52) | 0.328 |  | -0.35(-1.39,0.68) | 0.503 |  | -0.28(-1.32,0.75) | 0.594 |
| Model3 | -0.12(-1.09,0.85) | 0.805 |  | 0.25(-0.72,1.22) | 0.615 |  | 0(-0.97,0.97) | 0.996 |
| ***Diastolic blood pressure, mmHg*** |  |  |  |  |  |  |  |  |
| **White blood cell count, 10^9/L** |  |  |  |  |  |  |  |  |
| Model1 | -0.46(-1.31,0.38) | 0.282 |  | -0.4(-1.29,0.49) | 0.378 |  | -0.58(-1.43,0.27) | 0.182 |
| Model2 | -0.61(-1.44,0.22) | 0.151 |  | -0.27(-1.15,0.61) | 0.544 |  | -0.48(-1.32,0.36) | 0.265 |
| Model3 | -0.46(-1.28,0.36) | 0.267 |  | -0.04(-0.9,0.83) | 0.935 |  | -0.24(-1.07,0.58) | 0.565 |
| **Lymphocyte percentage, %** |  |  |  |  |  |  |  |  |
| Model1 | -0.2(-1.06,0.65) | 0.642 |  | 0.27(-0.58,1.12) | 0.533 |  | 0.27(-0.58,1.13) | 0.530 |
| Model2 | -0.25(-1.09,0.59) | 0.56 |  | 0.04(-0.8,0.88) | 0.927 |  | 0.08(-0.76,0.93) | 0.847 |
| Model3 | -0.1(-0.93,0.72) | 0.805 |  | 0.09(-0.74,0.91) | 0.835 |  | -0.08(-0.91,0.75) | 0.845 |
| **Monocyte/Macrophage percentage, %** |  |  |  |  |  |  |  |  |
| Model1 | 0.52(-0.32,1.37) | 0.223 |  | 1.02(0.15,1.88) | 0.021 |  | 0.97(0.11,1.82) | 0.026 |
| Model2 | 0.46(-0.37,1.29) | 0.274 |  | 1.02(0.17,1.88) | 0.019 |  | 0.93(0.09,1.77) | 0.030 |
| Model3 | 0.39(-0.43,1.2) | 0.350 |  | 0.94(0.11,1.78) | 0.027 |  | 0.83(0.01,1.66) | 0.047 |
| **Lymphocyte count, 10^9/L** |  |  |  |  |  |  |  |  |
| Model1 | 1.08(0.23,1.93) | 0.013 |  | 0.24(-0.6,1.07) | 0.580 |  | 0.04(-0.83,0.92) | 0.921 |
| Model2 | 0.9(0.06,1.74) | 0.036 |  | 0.08(-0.74,0.91) | 0.843 |  | -0.06(-0.92,0.81) | 0.901 |
| Model3 | 0.84(0.02,1.67) | 0.045 |  | 0.11(-0.69,0.92) | 0.782 |  | -0.01(-0.86,0.84) | 0.990 |
| **Monocyte/Macrophage count, 10^9/L** |  |  |  |  |  |  |  |  |
| Model1 | 0.2(-0.59,0.99) | 0.613 |  | 1.11(0.13,2.09) | 0.027 |  | 0.62(-0.24,1.48) | 0.154 |
| Model2 | 0.17(-0.61,0.95) | 0.668 |  | 1.07(0.1,2.04) | 0.030 |  | 0.7(-0.15,1.55) | 0.105 |
| Model3 | 0.2(-0.56,0.96) | 0.605 |  | 1.07(0.12,2.02) | 0.027 |  | 0.68(-0.15,1.51) | 0.109 |
| **Neutrophil count, 10^9/L** |  |  |  |  |  |  |  |  |
| Model1 | 0.14(-0.7,0.98) | 0.749 |  | -0.64(-1.5,0.23) | 0.148 |  | -0.35(-1.22,0.52) | 0.430 |
| Model2 | 0.2(-0.64,1.03) | 0.643 |  | -0.5(-1.35,0.36) | 0.253 |  | -0.09(-0.95,0.78) | 0.847 |
| Model3 | 0.31(-0.5,1.13) | 0.450 |  | -0.21(-1.05,0.63) | 0.618 |  | 0.13(-0.71,0.98) | 0.756 |
| **Lymphocyte-Monocyte/macrophage ratio** |  |  |  |  |  |  |  |  |
| Model1 | 0.74(-0.11,1.6) | 0.089 |  | -0.34(-1.19,0.51) | 0.436 |  | -0.35(-1.2,0.5) | 0.418 |
| Model2 | 0.53(-0.31,1.38) | 0.216 |  | -0.46(-1.31,0.38) | 0.279 |  | -0.54(-1.38,0.3) | 0.205 |
| Model3 | 0.52(-0.31,1.34) | 0.220 |  | -0.48(-1.3,0.34) | 0.252 |  | -0.55(-1.37,0.27) | 0.191 |
| **Neutrophil/lymphocyte ratio** |  |  |  |  |  |  |  |  |
| Model1 | -0.21(-1.07,0.64) | 0.623 |  | -0.36(-1.21,0.5) | 0.411 |  | -0.41(-1.26,0.45) | 0.352 |
| Model2 | -0.21(-1.06,0.63) | 0.620 |  | -0.17(-1.01,0.68) | 0.702 |  | -0.18(-1.02,0.67) | 0.685 |
| Model3 | -0.02(-0.85,0.81) | 0.958 |  | 0.13(-0.7,0.96) | 0.760 |  | -0.04(-0.87,0.79) | 0.930 |
| ***Mean arterial pressure, mmHg*** |  |  |  |  |  |  |  |  |
| **White blood cell count, 10^9/L** |  |  |  |  |  |  |  |  |
| Model1 | -0.6(-1.45,0.25) | 0.167 |  | -0.73(-1.63,0.17) | 0.113 |  | -0.96(-1.82,-0.1) | 0.029 |
| Model2 | -0.7(-1.52,0.13) | 0.096 |  | -0.43(-1.3,0.44) | 0.330 |  | -0.68(-1.51,0.15) | 0.109 |
| Model3 | -0.5(-1.29,0.29) | 0.215 |  | -0.11(-0.94,0.72) | 0.794 |  | -0.36(-1.16,0.44) | 0.378 |
| **Lymphocyte percentage, %** |  |  |  |  |  |  |  |  |
| Model1 | -0.18(-1.04,0.69) | 0.688 |  | 0.25(-0.61,1.11) | 0.572 |  | 0.57(-0.29,1.44) | 0.194 |
| Model2 | -0.25(-1.08,0.59) | 0.562 |  | -0.04(-0.87,0.79) | 0.927 |  | 0.21(-0.63,1.04) | 0.629 |
| Model3 | -0.05(-0.85,0.75) | 0.906 |  | 0.03(-0.77,0.82) | 0.947 |  | -0.02(-0.82,0.78) | 0.963 |
| **Monocyte/Macrophage percentage, %** |  |  |  |  |  |  |  |  |
| Model1 | 0.88(0.03,1.73) | 0.043 |  | 1.09(0.22,1.96) | 0.015 |  | 1.38(0.52,2.24) | 0.002 |
| Model2 | 0.68(-0.14,1.5) | 0.106 |  | 1.08(0.24,1.92) | 0.012 |  | 1.27(0.44,2.1) | 0.003 |
| Model3 | 0.57(-0.21,1.36) | 0.153 |  | 0.97(0.16,1.78) | 0.019 |  | 1.14(0.34,1.93) | 0.005 |
| **Lymphocyte count, 10^9/L** |  |  |  |  |  |  |  |  |
| Model1 | 1.12(0.27,1.98) | 0.010 |  | 0.31(-0.53,1.15) | 0.468 |  | -0.03(-0.92,0.86) | 0.948 |
| Model2 | 0.95(0.12,1.78) | 0.025 |  | 0.11(-0.7,0.93) | 0.785 |  | -0.09(-0.94,0.77) | 0.844 |
| Model3 | 0.87(0.07,1.66) | 0.033 |  | 0.15(-0.63,0.93) | 0.706 |  | -0.02(-0.84,0.8) | 0.965 |
| **Monocyte/Macrophage count, 10^9/L** |  |  |  |  |  |  |  |  |
| Model1 | 0.23(-0.57,1.02) | 0.580 |  | 0.9(-0.09,1.89) | 0.075 |  | 0.62(-0.25,1.49) | 0.161 |
| Model2 | 0.24(-0.53,1.01) | 0.548 |  | 0.93(-0.03,1.89) | 0.057 |  | 0.85(0.01,1.68) | 0.048 |
| Model3 | 0.28(-0.46,1.01) | 0.462 |  | 0.92(0.01,1.84) | 0.048 |  | 0.82(0.01,1.62) | 0.047 |
| **Neutrophil count, 10^9/L** |  |  |  |  |  |  |  |  |
| Model1 | -0.1(-0.95,0.74) | 0.810 |  | -0.81(-1.68,0.06) | 0.069 |  | -0.89(-1.77,-0.01) | 0.049 |
| Model2 | 0.16(-0.67,0.98) | 0.711 |  | -0.44(-1.29,0.4) | 0.304 |  | -0.34(-1.2,0.51) | 0.430 |
| Model3 | 0.32(-0.47,1.11) | 0.431 |  | -0.06(-0.87,0.75) | 0.887 |  | -0.04(-0.86,0.78) | 0.919 |
| **Lymphocyte-Monocyte/macrophage ratio** |  |  |  |  |  |  |  |  |
| Model1 | 0.53(-0.34,1.39) | 0.232 |  | -0.45(-1.31,0.41) | 0.302 |  | -0.35(-1.2,0.51) | 0.423 |
| Model2 | 0.22(-0.61,1.05) | 0.605 |  | -0.64(-1.47,0.19) | 0.129 |  | -0.73(-1.56,0.09) | 0.082 |
| Model3 | 0.2(-0.6,1) | 0.628 |  | -0.67(-1.46,0.13) | 0.101 |  | -0.74(-1.54,0.05) | 0.066 |
| **Neutrophil/lymphocyte ratio** |  |  |  |  |  |  |  |  |
| Model1 | -0.43(-1.29,0.44) | 0.331 |  | -0.6(-1.46,0.26) | 0.174 |  | -0.63(-1.49,0.23) | 0.152 |
| Model2 | -0.32(-1.15,0.52) | 0.456 |  | -0.24(-1.07,0.6) | 0.576 |  | -0.21(-1.05,0.62) | 0.614 |
| Model3 | -0.06(-0.86,0.74) | 0.888 |  | 0.16(-0.64,0.97) | 0.693 |  | -0.03(-0.83,0.77) | 0.947 |
| Model1:Unadjusted | | | | | | | | |
| Model2:Adjusted for age , height , sex | | | | | | | | |
| Model3:Adjusted for age , height , sex , body mass index , maternal obesity | | | | | | | | |
| Q1: First quartile; Q2: second quartile; Q3: Third quartile; Q4: Fourth quartile. | | | | | | | | |
