# Supplementary material for: The Relationship Between White Blood Cell Counts and Pediatric Hypertension: A Prospective Cohort Study
Source: Research Square preprint supplement (doi:10.21203/rs.3.rs-7484387/v1), 2025-10-01
Supplement: Supplementary file 2 [file 5d12a64ed33468f569b8c467.docx]

| **Supplementary table 2. The increased risk of the variables in men on elevated blood pressure compared with Q1 for a cohort study** | | | | | | | | |
| --- | --- | --- | --- | --- | --- | --- | --- | --- |
| **Variables** | **Q2 vs Q1** | |  | **Q3 vs Q1** | |  | **Q4 vs Q1** | |
| **RR(95%CLs)** | **P** |  | **RR(95%CLs)** | **P** |  | **RR(95%CLs)** | **P** |
| **White blood cell count, 10^9/L** |  |  |  |  |  |  |  |  |
| Model1 | 0.95(0.55,1.63) | 0.843 |  | 0.73(0.42,1.3) | 0.286 |  | 0.71(0.41,1.22) | 0.218 |
| Model2 | 0.87(0.47,1.61) | 0.659 |  | 0.69(0.36,1.32) | 0.262 |  | 0.66(0.36,1.23) | 0.189 |
| Model3 | 1(0.56,1.79) | 0.999 |  | 0.83(0.45,1.52) | 0.537 |  | 0.84(0.47,1.51) | 0.558 |
| **Lymphocyte percentage, %** |  |  |  |  |  |  |  |  |
| Model1 | 0.87(0.51,1.5) | 0.627 |  | 1.01(0.59,1.72) | 0.973 |  | 1.01(0.58,1.77) | 0.973 |
| Model2 | 0.89(0.49,1.64) | 0.719 |  | 0.97(0.53,1.77) | 0.927 |  | 1.03(0.55,1.94) | 0.930 |
| Model3 | 0.98(0.55,1.75) | 0.956 |  | 0.99(0.56,1.75) | 0.979 |  | 0.92(0.51,1.68) | 0.793 |
| **Monocyte/Macrophage percentage, %** |  |  |  |  |  |  |  |  |
| Model1 | 1.12(0.67,1.89) | 0.666 |  | 1.11(0.67,1.84) | 0.688 |  | 2.19(1.27,3.78) | 0.005 |
| Model2 | 1.14(0.63,2.05) | 0.667 |  | 1.19(0.67,2.1) | 0.559 |  | 2.63(1.42,4.88) | 0.002 |
| Model3 | 1.19(0.68,2.08) | 0.533 |  | 1.1(0.64,1.88) | 0.726 |  | 2.57(1.43,4.61) | 0.002 |
| **Lymphocyte count, 10^9/L** |  |  |  |  |  |  |  |  |
| Model1 | 1.2(0.69,2.1) | 0.511 |  | 0.94(0.55,1.62) | 0.830 |  | 0.79(0.46,1.36) | 0.396 |
| Model2 | 1.19(0.64,2.23) | 0.585 |  | 0.92(0.5,1.69) | 0.792 |  | 0.76(0.41,1.4) | 0.370 |
| Model3 | 1.19(0.66,2.16) | 0.554 |  | 1(0.56,1.77) | 0.991 |  | 0.87(0.49,1.56) | 0.643 |
| **Monocyte/Macrophage count, 10^9/L** |  |  |  |  |  |  |  |  |
| Model1 | 1.25(0.76,2.04) | 0.374 |  | 1.64(0.87,3.09) | 0.123 |  | 1.62(0.94,2.79) | 0.081 |
| Model2 | 1.28(0.74,2.24) | 0.377 |  | 1.77(0.87,3.62) | 0.115 |  | 1.9(1.03,3.51) | 0.041 |
| Model3 | 1.34(0.8,2.27) | 0.266 |  | 1.83(0.94,3.56) | 0.077 |  | 2.13(1.19,3.83) | 0.011 |
| **Neutrophil count, 10^9/L** |  |  |  |  |  |  |  |  |
| Model1 | 1.12(0.65,1.92) | 0.681 |  | 0.98(0.56,1.7) | 0.934 |  | 0.89(0.51,1.57) | 0.699 |
| Model2 | 1.1(0.6,2.02) | 0.748 |  | 0.96(0.52,1.78) | 0.894 |  | 0.86(0.46,1.63) | 0.651 |
| Model3 | 1.2(0.68,2.13) | 0.524 |  | 1.15(0.64,2.07) | 0.648 |  | 1.05(0.58,1.93) | 0.863 |
| **Lymphocyte-Monocyte/macrophage ratio** |  |  |  |  |  |  |  |  |
| Model1 | 0.83(0.48,1.44) | 0.509 |  | 0.58(0.33,0.99) | 0.047 |  | 0.53(0.31,0.93) | 0.026 |
| Model2 | 0.79(0.42,1.46) | 0.446 |  | 0.49(0.26,0.91) | 0.023 |  | 0.45(0.24,0.85) | 0.013 |
| Model3 | 0.76(0.42,1.36) | 0.351 |  | 0.49(0.27,0.88) | 0.017 |  | 0.43(0.24,0.78) | 0.006 |
| **Neutrophil/lymphocyte ratio** |  |  |  |  |  |  |  |  |
| Model1 | 1.02(0.6,1.74) | 0.941 |  | 1(0.58,1.71) | 0.985 |  | 1.03(0.59,1.79) | 0.915 |
| Model2 | 0.98(0.54,1.78) | 0.944 |  | 1.03(0.56,1.91) | 0.917 |  | 1.03(0.55,1.92) | 0.933 |
| Model3 | 1.06(0.6,1.87) | 0.829 |  | 1.27(0.71,2.28) | 0.422 |  | 1.1(0.61,1.99) | 0.755 |
| Model1:Unadjusted | | | | | | | | |
| Model2:Adjusted for age , height , sex | | | | | | | | |
| Model3:Adjusted for age , height , sex , body mass index , maternal obesity | | | | | | | | |
| Q1: First quartile; Q2: second quartile; Q3: Third quartile; Q4: Fourth quartile. | | | | | | | | |
