# Supplementary material for: The Relationship Between White Blood Cell Counts and Pediatric Hypertension: A Prospective Cohort Study
Source: Research Square preprint supplement (doi:10.21203/rs.3.rs-7484387/v1), 2025-10-01
Supplement: Supplementary file 3 [file 61b48b428c493b8a411f9bca.docx]

| **Table 2. The follow-up hematological parameters between normal blood pressure and elevated blood pressure group［±s，n(%)］** | | | | |
| --- | --- | --- | --- | --- |
| **Variables** | **Overall** | **Normal blood pressure** | **Elevated blood pressure** | **P** |
| ***Overall*** |  |  |  |  |
| Sample size, n | 1,282 | 1,182 | 100 |  |
| White blood cell count, 10^9/L | 7.37±1.80 | 7.35±1.77 | 7.63±2.02 | 0.195 |
| Lymphocyte percentage, % | 36.21±8.75 | 36.26±8.74 | 35.58±8.90 | 0.399 |
| Monocyte/macrophage percentage, % | 7.20±2.82 | 7.30±2.85 | 5.97±2.06 | <0.001 |
| Lymphocyte count, 10^9/L | 2.61±0.71 | 2.61±0.71 | 2.66±0.71 | 0.656 |
| Monocyte/macrophage count, 10^9/L | 0.54±0.39 | 0.55±0.40 | 0.45±0.21 | <0.001 |
| Neutrophil count, 10^9/L | 4.20±1.52 | 4.19±1.50 | 4.38±1.77 | 0.298 |
| Lymphocyte-monocyte/macrophage ratio | 5.64±4.26 | 5.57±4.34 | 6.46±3.18 | <0.001 |
| Neutrophil/lymphocyte ratio | 1.70±1.29 | 1.70±1.32 | 1.73±0.80 | 0.560 |
| Glucose (blood sugar), mmol/L | 4.32±0.49 | 4.31±0.48 | 4.40±0.51 | 0.367 |
| Total cholesterol, mmol/L | 3.52±0.64 | 3.51±0.65 | 3.57±0.53 | 0.157 |
| Triglyceride, mmol/L | 1.03±0.53 | 1.00±0.47 | 1.35±0.97 | <0.001 |
| High-density lipoprotein cholesterol, mmol/L | 1.38±0.31 | 1.38±0.31 | 1.32±0.33 | 0.040 |
| Low-density lipoprotein cholesterol, mmol/L | 1.81±0.46 | 1.80±0.46 | 1.91±0.43 | 0.002 |
| Red blood cell count, 10^12/L | 4.57±0.36 | 4.55±0.36 | 4.73±0.36 | <0.001 |
| Hemoglobin, g/L | 124.49±8.81 | 124.09±8.76 | 129.24±8.04 | <0.001 |
| Hematocrit | 37.09±2.78 | 36.95±2.72 | 38.71±3.01 | <0.001 |
| Mean corpuscular volume, f/L | 80.83±7.75 | 80.78±7.80 | 81.33±7.21 | 0.441 |
| Mean corpuscular hemoglobin, pg | 27.42±1.94 | 27.42±1.97 | 27.43±1.57 | 0.507 |
| Mean corpuscular hemoglobin concentration, g/L | 336.54±14.83 | 336.59±14.71 | 335.91±16.26 | 0.398 |
| Platelet count, 10^9/L | 300.98±68.88 | 300.81±69.46 | 303.02±61.99 | 0.569 |
| Red blood cell distribution width-SD, fL | 34.22±4.95 | 34.13±4.85 | 35.31±5.89 | 0.012 |
| Platelet distribution width, fL | 13.25±2.42 | 13.26±2.42 | 13.15±2.41 | 0.451 |
| Mean platelet volume, fL | 10.50±1.35 | 10.49±1.36 | 10.70±1.23 | 0.080 |
| Large platelet ratio | 31.36±8.71 | 31.34±8.74 | 31.68±8.30 | 0.626 |
| Platelet count/lymphocyte count | 121.94±44.58 | 122.02±44.88 | 121.02±40.99 | 0.735 |
| Height, cm | 151.94±7.98 | 151.67±7.97 | 155.05±7.48 | <0.001 |
| Weight, kg | 44.08±10.59 | 43.34±9.94 | 52.79±13.73 | <0.001 |
| Body mass index, kg/m2 | 18.91±3.43 | 18.67±3.21 | 21.75±4.53 | <0.001 |
| Region, n(%) |  |  |  | <0.001 |
| Urban | 1,057(82.45) | 1,004(84.94) | 53(53.00) |  |
| Rural | 225(17.55) | 178(15.06) | 47(47.00) |  |
| Obesity, n(%) |  |  |  | <0.001 |
| No | 1,174(91.72) | 1,105(93.64) | 69(69.00) |  |
| Yes | 106(8.28) | 75(6.36) | 31(31.00) |  |
| Maternal obesity, n(%) |  |  |  | 0.013 |
| No | 1,155(90.09) | 1,072(90.69) | 83(83.00) |  |
| Yes | 127(9.91) | 110(9.31) | 17(17.00) |  |
| ***Male*** |  |  |  |  |
| Sample size, n | 667 | 615 | 52 |  |
| White blood cell count, 10^9/L | 7.39±1.75 | 7.34±1.71 | 7.95±2.10 | 0.028 |
| Lymphocyte percentage, % | 36.14±8.60 | 36.24±8.51 | 35.02±9.67 | 0.151 |
| Monocyte/macrophage percentage, % | 7.36±2.98 | 7.47±3.01 | 6.01±2.27 | <0.001 |
| Lymphocyte count, 10^9/L | 2.61±0.68 | 2.60±0.68 | 2.73±0.73 | 0.382 |
| Monocyte/macrophage count, 10^9/L | 0.53±0.28 | 0.54±0.28 | 0.48±0.21 | 0.041 |
| Neutrophil count, 10^9/L | 4.21±1.54 | 4.17±1.48 | 4.64±2.03 | 0.067 |
| Lymphocyte-monocyte/macrophage ratio | 5.56±4.17 | 5.46±4.21 | 6.71±3.47 | 0.008 |
| Neutrophil/lymphocyte ratio | 1.75±1.01 | 1.74±1.02 | 1.81±0.93 | 0.278 |
| Glucose (blood sugar), mmol/L | 4.36±0.48 | 4.35±0.48 | 4.46±0.56 | 0.438 |
| Total cholesterol, mmol/L | 3.49±0.64 | 3.48±0.65 | 3.56±0.50 | 0.163 |
| Triglyceride, mmol/L | 1.01±0.53 | 0.98±0.49 | 1.32±0.79 | <0.001 |
| High-density lipoprotein cholesterol, mmol/L | 1.37±0.31 | 1.37±0.31 | 1.29±0.32 | 0.094 |
| Low-density lipoprotein cholesterol, mmol/L | 1.78±0.46 | 1.78±0.46 | 1.90±0.39 | 0.013 |
| Red blood cell count, 10^12/L | 4.60±0.35 | 4.59±0.35 | 4.76±0.39 | 0.001 |
| Hemoglobin, g/L | 124.83±8.52 | 124.54±8.45 | 128.25±8.69 | 0.006 |
| Hematocrit | 37.15±2.87 | 37.04±2.81 | 38.41±3.20 | 0.004 |
| Mean corpuscular volume, f/L | 80.50±7.00 | 80.46±7.14 | 80.93±5.09 | 0.783 |
| Mean corpuscular hemoglobin, pg | 27.28±2.01 | 27.30±2.04 | 27.09±1.72 | 0.281 |
| Mean corpuscular hemoglobin concentration, g/L | 336.59±15.26 | 336.63±15.09 | 336.10±17.36 | 0.529 |
| Platelet count, 10^9/L | 301.34±70.70 | 300.37±71.67 | 312.73±57.34 | 0.157 |
| Red blood cell distribution width-SD, fL | 34.13±5.04 | 34.08±4.95 | 34.72±5.98 | 0.301 |
| Platelet distribution width, fL | 13.36±2.37 | 13.42±2.40 | 12.77±2.01 | 0.061 |
| Mean platelet volume, fL | 10.52±1.36 | 10.51±1.38 | 10.55±1.12 | 0.720 |
| Large platelet ratio | 31.69±8.86 | 31.76±8.94 | 30.83±7.94 | 0.475 |
| Platelet count/lymphocyte count | 122.14±41.06 | 122.17±41.37 | 121.83±37.54 | 0.824 |
| Height, cm | 151.68±8.56 | 151.37±8.54 | 155.24±8.07 | 0.001 |
| Weight, kg | 44.57±11.20 | 43.72±10.40 | 54.61±14.96 | <0.001 |
| Body mass index, kg/m2 | 19.17±3.58 | 18.90±3.34 | 22.35±4.65 | <0.001 |
| Region, n(%) |  |  |  | <0.001 |
| Urban | 556(83.36) | 525(85.37) | 31(59.62) |  |
| Rural | 111(16.64) | 90(14.63) | 21(40.38) |  |
| Obesity, n(%) |  |  |  | <0.001 |
| No | 592(88.89) | 559(91.04) | 33(63.46) |  |
| Yes | 74(11.11) | 55(8.96) | 19(36.54) |  |
| Maternal obesity, n(%) |  |  |  | 0.003 |
| No | 609(91.30) | 568(92.36) | 41(78.85) |  |
| Yes | 58(8.70) | 47(7.64) | 11(21.15) |  |
| ***Female*** |  |  |  |  |
| Sample size, n | 615 | 567 | 48 |  |
| White blood cell count, 10^9/L | 7.36±1.85 | 7.37±1.85 | 7.28±1.90 | 0.732 |
| Lymphocyte percentage, % | 36.28±8.92 | 36.29±9.00 | 36.18±8.03 | 0.775 |
| Monocyte/macrophage percentage, % | 7.02±2.63 | 7.12±2.67 | 5.94±1.83 | <0.001 |
| Lymphocyte count, 10^9/L | 2.61±0.73 | 2.62±0.74 | 2.59±0.70 | 0.814 |
| Monocyte/macrophage count, 10^9/L | 0.55±0.49 | 0.56±0.50 | 0.41±0.21 | 0.003 |
| Neutrophil count, 10^9/L | 4.20±1.50 | 4.21±1.51 | 4.09±1.39 | 0.736 |
| Lymphocyte-monocyte/macrophage ratio | 5.72±4.37 | 5.68±4.47 | 6.20±2.86 | 0.018 |
| Neutrophil/lymphocyte ratio | 1.66±1.53 | 1.66±1.59 | 1.65±0.63 | 0.784 |
| Glucose (blood sugar), mmol/L | 4.28±0.49 | 4.27±0.49 | 4.34±0.45 | 0.567 |
| Total cholesterol, mmol/L | 3.55±0.65 | 3.55±0.66 | 3.58±0.55 | 0.549 |
| Triglyceride, mmol/L | 1.06±0.53 | 1.03±0.44 | 1.39±1.14 | 0.053 |
| High-density lipoprotein cholesterol, mmol/L | 1.39±0.31 | 1.39±0.30 | 1.36±0.35 | 0.222 |
| Low-density lipoprotein cholesterol, mmol/L | 1.83±0.46 | 1.82±0.46 | 1.91±0.46 | 0.06 |
| Red blood cell count, 10^12/L | 4.53±0.36 | 4.52±0.36 | 4.71±0.33 | <0.001 |
| Hemoglobin, g/L | 124.12±9.11 | 123.60±9.07 | 130.31±7.21 | <0.001 |
| Hematocrit | 37.03±2.69 | 36.86±2.61 | 39.03±2.78 | <0.001 |
| Mean corpuscular volume, f/L | 81.18±8.48 | 81.13±8.44 | 81.77±8.99 | 0.419 |
| Mean corpuscular hemoglobin, pg | 27.57±1.85 | 27.55±1.89 | 27.80±1.31 | 0.963 |
| Mean corpuscular hemoglobin concentration, g/L | 336.48±14.36 | 336.55±14.30 | 335.71±15.16 | 0.579 |
| Platelet count, 10^9/L | 300.60±66.91 | 301.28±67.03 | 292.50±65.64 | 0.496 |
| Red blood cell distribution width-SD, fL | 34.33±4.85 | 34.19±4.75 | 35.94±5.79 | 0.01 |
| Platelet distribution width, fL | 13.13±2.47 | 13.09±2.44 | 13.56±2.75 | 0.44 |
| Mean platelet volume, fL | 10.49±1.33 | 10.46±1.33 | 10.87±1.33 | 0.031 |
| Large platelet ratio | 31.01±8.53 | 30.87±8.51 | 32.61±8.66 | 0.146 |
| Platelet count/lymphocyte count | 121.73±48.14 | 121.87±48.44 | 120.14±44.81 | 0.464 |
| Height, cm | 152.22±7.30 | 151.99±7.30 | 154.85±6.85 | 0.007 |
| Weight, kg | 43.54±9.86 | 42.93±9.41 | 50.83±12.11 | <0.001 |
| Body mass index, kg/m2 | 18.63±3.24 | 18.42±3.04 | 21.10±4.34 | <0.001 |
| Region, n(%) |  |  |  | <0.001 |
| Urban | 501(81.46) | 479(84.48) | 22(45.83) |  |
| Rural | 114(18.54) | 88(15.52) | 26(54.17) |  |
| Obesity, n(%) |  |  |  | <0.001 |
| No | 582(94.79) | 546(96.47) | 36(75.00) |  |
| Yes | 32(5.21) | 20(3.53) | 12(25.00) |  |
| Maternal obesity, n(%) |  |  |  | 0.770 |
| No | 546(88.78) | 504(88.89) | 42(87.50) |  |
| Yes | 69(11.22) | 63(11.11) | 6(12.50) |  |
