# Supplementary material for: The Relationship Between White Blood Cell Counts and Pediatric Hypertension: A Prospective Cohort Study
Source: Research Square preprint supplement (doi:10.21203/rs.3.rs-7484387/v1), 2025-10-01
Supplement: Supplementary file 4 [file a2114c8e1d935009e8d88c57.docx]

| **Table 5. The mediating effect of the quartile groups of blood indicators in body mass index on blood pressure for a cohort study** | | | |
| --- | --- | --- | --- |
| **Variable** | **Effect** | **β(95%CIs)** | **P** |
| ***Systolic blood pressure, mmHg*** |  |  |  |
| White blood cell count, 10^9/L | ACME | -0.00 (-0.00, 0.00) | 0.994 |
| White blood cell count, 10^9/L | ADE | 0.90 (0.79, 1.00) | 0.000 |
| White blood cell count, 10^9/L | Total Effect | 0.90 (0.79, 1.00) | 0.000 |
| White blood cell count, 10^9/L | Prop. Mediated | -0.00 (-0.00, 0.00) | 0.994 |
| Lymphocyte percentage, % | ACME | 0.00 (-0.00, 0.00) | 0.938 |
| Lymphocyte percentage, % | ADE | 0.91 (0.81, 1.02) | 0.000 |
| Lymphocyte percentage, % | Total Effect | 0.91 (0.81, 1.02) | 0.000 |
| Lymphocyte percentage, % | Prop. Mediated | 0.00 (-0.00, 0.00) | 0.938 |
| Monocyte/Macrophage percentage, % | ACME | 0.00 (-0.00, 0.00) | 0.856 |
| Monocyte/Macrophage percentage, % | ADE | 0.90 (0.80, 1.01) | 0.000 |
| Monocyte/Macrophage percentage, % | Total Effect | 0.90 (0.80, 1.01) | 0.000 |
| Monocyte/Macrophage percentage, % | Prop. Mediated | 0.00 (-0.00, 0.00) | 0.856 |
| Lymphocyte count, 10^9/L | ACME | 0.00 (-0.00, 0.00) | 0.852 |
| Lymphocyte count, 10^9/L | ADE | 0.91 (0.80, 1.01) | 0.000 |
| Lymphocyte count, 10^9/L | Total Effect | 0.91 (0.80, 1.01) | 0.000 |
| Lymphocyte count, 10^9/L | Prop. Mediated | 0.00 (-0.00, 0.00) | 0.852 |
| Monocyte/Macrophage count, 10^9/L | ACME | -0.00 (-0.00, 0.00) | 0.888 |
| Monocyte/Macrophage count, 10^9/L | ADE | 0.91 (0.80, 1.02) | 0.000 |
| Monocyte/Macrophage count, 10^9/L | Total Effect | 0.91 (0.80, 1.02) | 0.000 |
| Monocyte/Macrophage count, 10^9/L | Prop. Mediated | -0.00 (-0.00, 0.00) | 0.888 |
| Neutrophil count, 10^9/L | ACME | 0.00 (-0.00, 0.00) | 0.934 |
| Neutrophil count, 10^9/L | ADE | 0.91 (0.80, 1.01) | 0.000 |
| Neutrophil count, 10^9/L | Total Effect | 0.91 (0.80, 1.01) | 0.000 |
| Neutrophil count, 10^9/L | Prop. Mediated | 0.00 (-0.00, 0.00) | 0.934 |
| Lymphocyte-Monocyte/macrophage ratio | ACME | -0.00 (-0.00, 0.00) | 0.730 |
| Lymphocyte-Monocyte/macrophage ratio | ADE | 0.91 (0.80, 1.02) | 0.000 |
| Lymphocyte-Monocyte/macrophage ratio | Total Effect | 0.91 (0.80, 1.02) | 0.000 |
| Lymphocyte-Monocyte/macrophage ratio | Prop. Mediated | -0.00 (-0.00, 0.00) | 0.730 |
| Neutrophil/lymphocyte ratio | ACME | -0.00 (-0.00, 0.00) | 0.924 |
| Neutrophil/lymphocyte ratio | ADE | 0.91 (0.80, 1.02) | 0.000 |
| Neutrophil/lymphocyte ratio | Total Effect | 0.91 (0.80, 1.02) | 0.000 |
| Neutrophil/lymphocyte ratio | Prop. Mediated | -0.00 (-0.00, 0.00) | 0.924 |
| ***Diastolic blood pressure, mmHg*** |  |  |  |
| White blood cell count, 10^9/L | ACME | 0.00 (-0.00, 0.00) | 0.990 |
| White blood cell count, 10^9/L | ADE | 0.44 (0.34, 0.53) | 0.000 |
| White blood cell count, 10^9/L | Total Effect | 0.44 (0.34, 0.53) | 0.000 |
| White blood cell count, 10^9/L | Prop. Mediated | 0.00 (-0.00, 0.00) | 0.990 |
| Lymphocyte percentage, % | ACME | 0.00 (-0.00, 0.00) | 0.978 |
| Lymphocyte percentage, % | ADE | 0.44 (0.35, 0.53) | 0.000 |
| Lymphocyte percentage, % | Total Effect | 0.44 (0.35, 0.53) | 0.000 |
| Lymphocyte percentage, % | Prop. Mediated | 0.00 (-0.00, 0.00) | 0.978 |
| Monocyte/Macrophage percentage, % | ACME | 0.00 (-0.00, 0.00) | 0.870 |
| Monocyte/Macrophage percentage, % | ADE | 0.43 (0.34, 0.53) | 0.000 |
| Monocyte/Macrophage percentage, % | Total Effect | 0.43 (0.35, 0.53) | 0.000 |
| Monocyte/Macrophage percentage, % | Prop. Mediated | 0.00 (-0.00, 0.01) | 0.870 |
| Lymphocyte count, 10^9/L | ACME | 0.00 (-0.00, 0.00) | 0.852 |
| Lymphocyte count, 10^9/L | ADE | 0.44 (0.34, 0.53) | 0.000 |
| Lymphocyte count, 10^9/L | Total Effect | 0.44 (0.34, 0.53) | 0.000 |
| Lymphocyte count, 10^9/L | Prop. Mediated | 0.00 (-0.00, 0.00) | 0.852 |
| Monocyte/Macrophage count, 10^9/L | ACME | -0.00 (-0.00, 0.00) | 0.936 |
| Monocyte/Macrophage count, 10^9/L | ADE | 0.43 (0.34, 0.53) | 0.000 |
| Monocyte/Macrophage count, 10^9/L | Total Effect | 0.43 (0.34, 0.53) | 0.000 |
| Monocyte/Macrophage count, 10^9/L | Prop. Mediated | -0.00 (-0.01, 0.00) | 0.936 |
| Neutrophil count, 10^9/L | ACME | 0.00 (-0.00, 0.00) | 0.960 |
| Neutrophil count, 10^9/L | ADE | 0.44 (0.34, 0.53) | 0.000 |
| Neutrophil count, 10^9/L | Total Effect | 0.44 (0.34, 0.53) | 0.000 |
| Neutrophil count, 10^9/L | Prop. Mediated | 0.00 (-0.00, 0.00) | 0.960 |
| Lymphocyte-Monocyte/macrophage ratio | ACME | -0.00 (-0.00, 0.00) | 0.782 |
| Lymphocyte-Monocyte/macrophage ratio | ADE | 0.44 (0.35, 0.53) | 0.000 |
| Lymphocyte-Monocyte/macrophage ratio | Total Effect | 0.44 (0.35, 0.52) | 0.000 |
| Lymphocyte-Monocyte/macrophage ratio | Prop. Mediated | -0.00 (-0.01, 0.00) | 0.782 |
| Neutrophil/lymphocyte ratio | ACME | 0.00 (-0.00, 0.00) | 0.990 |
| Neutrophil/lymphocyte ratio | ADE | 0.43 (0.34, 0.53) | 0.000 |
| Neutrophil/lymphocyte ratio | Total Effect | 0.43 (0.34, 0.53) | 0.000 |
| Neutrophil/lymphocyte ratio | Prop. Mediated | -0.00 (-0.00, 0.00) | 0.990 |
| ***Mean arterial pressure, mmHg*** |  |  |  |
| White blood cell count, 10^9/L | ACME | 0.00 (-0.00, 0.00) | 0.994 |
| White blood cell count, 10^9/L | ADE | -0.61 (-1.76, 0.55) | 0.308 |
| White blood cell count, 10^9/L | Total Effect | -0.61 (-1.76, 0.55) | 0.308 |
| White blood cell count, 10^9/L | Prop. Mediated | 0.00 (-0.00, 0.00) | 0.966 |
| Lymphocyte percentage, % | ACME | -0.00 (-0.02, 0.02) | 0.974 |
| Lymphocyte percentage, % | ADE | -0.59 (-1.75, 0.57) | 0.334 |
| Lymphocyte percentage, % | Total Effect | -0.59 (-1.76, 0.58) | 0.334 |
| Lymphocyte percentage, % | Prop. Mediated | 0.00 (-0.10, 0.07) | 0.996 |
| Monocyte/Macrophage percentage, % | ACME | -0.02 (-0.07, 0.03) | 0.414 |
| Monocyte/Macrophage percentage, % | ADE | -0.60 (-1.74, 0.57) | 0.326 |
| Monocyte/Macrophage percentage, % | Total Effect | -0.61 (-1.77, 0.54) | 0.3 |
| Monocyte/Macrophage percentage, % | Prop. Mediated | 0.02 (-0.38, 0.49) | 0.578 |
| Lymphocyte count, 10^9/L | ACME | 0.01 (-0.01, 0.03) | 0.532 |
| Lymphocyte count, 10^9/L | ADE | -0.60 (-1.75, 0.56) | 0.318 |
| Lymphocyte count, 10^9/L | Total Effect | -0.59 (-1.75, 0.57) | 0.328 |
| Lymphocyte count, 10^9/L | Prop. Mediated | -0.00 (-0.15, 0.14) | 0.72 |
| Monocyte/Macrophage count, 10^9/L | ACME | 0.00 (-0.04, 0.05) | 0.85 |
| Monocyte/Macrophage count, 10^9/L | ADE | -0.55 (-1.70, 0.61) | 0.366 |
| Monocyte/Macrophage count, 10^9/L | Total Effect | -0.55 (-1.70, 0.61) | 0.372 |
| Monocyte/Macrophage count, 10^9/L | Prop. Mediated | -0.00 (-0.28, 0.22) | 0.894 |
| Neutrophil count, 10^9/L | ACME | -0.00 (-0.02, 0.01) | 0.556 |
| Neutrophil count, 10^9/L | ADE | -0.60 (-1.75, 0.56) | 0.312 |
| Neutrophil count, 10^9/L | Total Effect | -0.61 (-1.75, 0.56) | 0.314 |
| Neutrophil count, 10^9/L | Prop. Mediated | 0.00 (-0.08, 0.09) | 0.682 |
| Lymphocyte-Monocyte/macrophage ratio | ACME | 0.02 (-0.02, 0.08) | 0.246 |
| Lymphocyte-Monocyte/macrophage ratio | ADE | -0.60 (-1.76, 0.56) | 0.318 |
| Lymphocyte-Monocyte/macrophage ratio | Total Effect | -0.58 (-1.73, 0.60) | 0.34 |
| Lymphocyte-Monocyte/macrophage ratio | Prop. Mediated | -0.02 (-0.43, 0.49) | 0.518 |
| Neutrophil/lymphocyte ratio | ACME | 0.00 (-0.02, 0.03) | 0.906 |
| Neutrophil/lymphocyte ratio | ADE | -0.59 (-1.74, 0.58) | 0.33 |
| Neutrophil/lymphocyte ratio | Total Effect | -0.59 (-1.74, 0.58) | 0.332 |
| Neutrophil/lymphocyte ratio | Prop. Mediated | -0.00 (-0.16, 0.10) | 0.942 |
| ***Elevated blood pressure relative to normal******ones*** |  |  |  |
| White blood cell count, 10^9/L | ACME | 0.00 (-0.00, 0.00) | 1 |
| White blood cell count, 10^9/L | ADE | 0.02 (-0.04, 0.09) | 0.56 |
| White blood cell count, 10^9/L | Total Effect | 0.02 (-0.04, 0.09) | 0.56 |
| White blood cell count, 10^9/L | Prop. Mediated | -0.00 (-0.00, 0.00) | 0.984 |
| Lymphocyte percentage, % | ACME | 0.00 (-0.00, 0.00) | 0.902 |
| Lymphocyte percentage, % | ADE | 0.02 (-0.04, 0.09) | 0.528 |
| Lymphocyte percentage, % | Total Effect | 0.02 (-0.04, 0.09) | 0.524 |
| Lymphocyte percentage, % | Prop. Mediated | 0.00 (-0.07, 0.11) | 0.906 |
| Monocyte/Macrophage percentage, % | ACME | -0.00 (-0.00, 0.00) | 0.42 |
| Monocyte/Macrophage percentage, % | ADE | 0.02 (-0.04, 0.09) | 0.568 |
| Monocyte/Macrophage percentage, % | Total Effect | 0.02 (-0.04, 0.09) | 0.586 |
| Monocyte/Macrophage percentage, % | Prop. Mediated | -0.01 (-0.45, 0.39) | 0.778 |
| Lymphocyte count, 10^9/L | ACME | 0.00 (-0.00, 0.00) | 0.676 |
| Lymphocyte count, 10^9/L | ADE | 0.02 (-0.04, 0.09) | 0.53 |
| Lymphocyte count, 10^9/L | Total Effect | 0.02 (-0.04, 0.09) | 0.528 |
| Lymphocyte count, 10^9/L | Prop. Mediated | 0.00 (-0.11, 0.16) | 0.844 |
| Monocyte/Macrophage count, 10^9/L | ACME | 0.00 (-0.00, 0.00) | 0.846 |
| Monocyte/Macrophage count, 10^9/L | ADE | 0.02 (-0.04, 0.09) | 0.524 |
| Monocyte/Macrophage count, 10^9/L | Total Effect | 0.02 (-0.04, 0.09) | 0.522 |
| Monocyte/Macrophage count, 10^9/L | Prop. Mediated | 0.00 (-0.27, 0.29) | 0.956 |
| Neutrophil count, 10^9/L | ACME | 0.00 (-0.00, 0.00) | 0.788 |
| Neutrophil count, 10^9/L | ADE | 0.02 (-0.04, 0.09) | 0.528 |
| Neutrophil count, 10^9/L | Total Effect | 0.02 (-0.04, 0.09) | 0.526 |
| Neutrophil count, 10^9/L | Prop. Mediated | 0.00 (-0.10, 0.10) | 0.878 |
| Lymphocyte-Monocyte/macrophage ratio | ACME | 0.00 (-0.00, 0.01) | 0.236 |
| Lymphocyte-Monocyte/macrophage ratio | ADE | 0.02 (-0.04, 0.09) | 0.588 |
| Lymphocyte-Monocyte/macrophage ratio | Total Effect | 0.02 (-0.04, 0.09) | 0.544 |
| Lymphocyte-Monocyte/macrophage ratio | Prop. Mediated | 0.02 (-0.54, 0.98) | 0.632 |
| Neutrophil/lymphocyte ratio | ACME | 0.00 (-0.00, 0.00) | 0.622 |
| Neutrophil/lymphocyte ratio | ADE | 0.02 (-0.04, 0.09) | 0.548 |
| Neutrophil/lymphocyte ratio | Total Effect | 0.02 (-0.04, 0.09) | 0.544 |
| Neutrophil/lymphocyte ratio | Prop. Mediated | 0.00 (-0.16, 0.23) | 0.822 |
| Adjusted for age, height, maternal obesity | | | |
| ACME: Average causal mediation effect; ADE: Average direct effect; Prop. Mediated: Proportion mediated. | | | |
| Confidence intervals and p-values estimated through nonparametric bootstrap with 1000 simulations. | | | |
