# Supplementary material for: The Relationship Between White Blood Cell Counts and Pediatric Hypertension: A Prospective Cohort Study
Source: Research Square preprint supplement (doi:10.21203/rs.3.rs-7484387/v1), 2025-10-01
Supplement: Supplementary file 5 [file c510296184efad6c0670a98a.docx]

| **Table 3. The relationship of variables interquartile range increase and blood pressure levels for a cohort study** | | | | | | | | |
| --- | --- | --- | --- | --- | --- | --- | --- | --- |
| **Variables** | **Overall** | |  | **Male** | |  | **Female** | |
| **β（95%CIs)** | **P** |  | **β（95%CIs)** | **P** |  | **β（95%CIs)** | **P** |
| ***Systolic blood pressure, mmHg*** |  |  |  |  |  |  |  |  |
| **White blood cell count, 10^9/L** |  |  |  |  |  |  |  |  |
| Model1 | 0.56(0.21,0.91) | 0.002 |  | 0.71(0.21,1.21) | 0.005 |  | 0.36(-0.13,0.85) | 0.151 |
| Model2 | 0.31(-0.02,0.64) | 0.062 |  | 0.54(0.07,1) | 0.024 |  | 0.07(-0.39,0.53) | 0.771 |
| Model3 | 0.15(-0.16,0.45) | 0.346 |  | 0.24(-0.19,0.67) | 0.269 |  | 0.02(-0.42,0.45) | 0.945 |
| **Lymphocyte percentage, %** |  |  |  |  |  |  |  |  |
| Model1 | -0.38(-0.74,-0.03) | 0.036 |  | -0.44(-0.95,0.06) | 0.087 |  | -0.33(-0.82,0.16) | 0.187 |
| Model2 | -0.13(-0.45,0.2) | 0.447 |  | -0.21(-0.68,0.27) | 0.393 |  | -0.05(-0.5,0.4) | 0.831 |
| Model3 | -0.01(-0.31,0.3) | 0.959 |  | -0.06(-0.5,0.37) | 0.775 |  | 0.06(-0.37,0.49) | 0.778 |
| **Monocyte/Macrophage percentage, %** |  |  |  |  |  |  |  |  |
| Model1 | -0.63(-0.99,-0.28) | <0.001 |  | -0.80(-1.28,-0.31) | 0.001 |  | -0.52(-1.03,-0.01) | 0.045 |
| Model2 | -0.59(-0.91,-0.27) | <0.001 |  | -0.77(-1.22,-0.32) | 0.001 |  | -0.36(-0.84,0.11) | 0.131 |
| Model3 | -0.53(-0.84,-0.23) | 0.001 |  | -0.75(-1.16,-0.34) | <0.001 |  | -0.26(-0.71,0.19) | 0.258 |
| **Lymphocyte count, 10^9/L** |  |  |  |  |  |  |  |  |
| Model1 | 0.11(-0.25,0.47) | 0.550 |  | 0.2(-0.31,0.71) | 0.440 |  | -0.07(-0.58,0.45) | 0.797 |
| Model2 | 0.12(-0.21,0.46) | 0.471 |  | 0.3(-0.17,0.77) | 0.210 |  | -0.08(-0.55,0.4) | 0.754 |
| Model3 | 0.07(-0.24,0.39) | 0.640 |  | 0.15(-0.28,0.58) | 0.493 |  | -0.04(-0.49,0.41) | 0.869 |
| **Monocyte/Macrophage count, 10^9/L** |  |  |  |  |  |  |  |  |
| Model1 | -0.21(-0.57,0.15) | 0.258 |  | -0.29(-0.79,0.21) | 0.249 |  | -0.24(-0.75,0.27) | 0.362 |
| Model2 | -0.37(-0.7,-0.04) | 0.028 |  | -0.39(-0.85,0.07) | 0.099 |  | -0.34(-0.81,0.13) | 0.157 |
| Model3 | -0.35(-0.66,-0.04) | 0.027 |  | -0.53(-0.95,-0.1) | 0.015 |  | -0.17(-0.61,0.28) | 0.471 |
| **Neutrophil count, 10^9/L** |  |  |  |  |  |  |  |  |
| Model1 | 0.64(0.28,1) | <0.001 |  | 0.79(0.28,1.31) | 0.003 |  | 0.47(-0.02,0.96) | 0.061 |
| Model2 | 0.29(-0.04,0.63) | 0.085 |  | 0.50(0.02,0.99) | 0.043 |  | 0.09(-0.37,0.55) | 0.715 |
| Model3 | 0.12(-0.19,0.43) | 0.448 |  | 0.23(-0.22,0.67) | 0.320 |  | -0.01(-0.45,0.43) | 0.974 |
| **Lymphocyte-Monocyte/macrophage ratio** |  |  |  |  |  |  |  |  |
| Model1 | 0.18(-0.17,0.53) | 0.314 |  | 0.31(-0.19,0.8) | 0.230 |  | 0.13(-0.36,0.63) | 0.595 |
| Model2 | 0.39(0.07,0.72) | 0.017 |  | 0.45(-0.01,0.91) | 0.054 |  | 0.32(-0.13,0.78) | 0.167 |
| Model3 | 0.40(0.10,0.70) | 0.010 |  | 0.56(0.14,0.98) | 0.010 |  | 0.24(-0.2,0.67) | 0.283 |
| **Neutrophil/lymphocyte ratio** |  |  |  |  |  |  |  |  |
| Model1 | 0.35(-0.01,0.70) | 0.054 |  | 0.43(-0.08,0.93) | 0.096 |  | 0.29(-0.2,0.78) | 0.240 |
| Model2 | 0.07(-0.26,0.40) | 0.683 |  | 0.14(-0.33,0.60) | 0.569 |  | 0(-0.46,0.45) | 0.998 |
| Model3 | -0.04(-0.34,0.27) | 0.813 |  | 0(-0.43,0.43) | 0.998 |  | -0.09(-0.52,0.35) | 0.700 |
| ***Diastolic blood pressure, mmHg*** |  |  |  |  |  |  |  |  |
| **White blood cell count, 10^9/L** |  |  |  |  |  |  |  |  |
| Model1 | 0.17(-0.1,0.44) | 0.224 |  | 0.32(-0.06,0.71) | 0.101 |  | 0.02(-0.36,0.4) | 0.921 |
| Model2 | 0.11(-0.16,0.38) | 0.417 |  | 0.29(-0.1,0.67) | 0.142 |  | -0.09(-0.46,0.28) | 0.639 |
| Model3 | 0.03(-0.23,0.29) | 0.813 |  | 0.12(-0.25,0.49) | 0.535 |  | -0.11(-0.47,0.26) | 0.563 |
| **Lymphocyte percentage, %** |  |  |  |  |  |  |  |  |
| Model1 | -0.13(-0.4,0.14) | 0.348 |  | -0.09(-0.48,0.3) | 0.644 |  | -0.17(-0.54,0.2) | 0.369 |
| Model2 | -0.05(-0.32,0.21) | 0.696 |  | -0.04(-0.43,0.35) | 0.835 |  | -0.06(-0.43,0.3) | 0.734 |
| Model3 | 0.01(-0.26,0.27) | 0.967 |  | 0.04(-0.33,0.42) | 0.822 |  | -0.02(-0.38,0.34) | 0.908 |
| **Monocyte/Macrophage percentage, %** |  |  |  |  |  |  |  |  |
| Model1 | -0.34(-0.61,-0.07) | 0.014 |  | -0.53(-0.91,-0.16) | 0.005 |  | -0.07(-0.46,0.32) | 0.736 |
| Model2 | -0.33(-0.6,-0.07) | 0.014 |  | -0.56(-0.92,-0.19) | 0.003 |  | -0.05(-0.43,0.33) | 0.790 |
| Model3 | -0.3(-0.56,-0.04) | 0.023 |  | -0.54(-0.9,-0.19) | 0.003 |  | -0.01(-0.39,0.37) | 0.950 |
| **Lymphocyte count, 10^9/L** |  |  |  |  |  |  |  |  |
| Model1 | 0.06(-0.21,0.34) | 0.653 |  | 0.24(-0.15,0.62) | 0.236 |  | -0.1(-0.5,0.29) | 0.600 |
| Model2 | 0.09(-0.18,0.37) | 0.500 |  | 0.26(-0.13,0.64) | 0.193 |  | -0.1(-0.48,0.29) | 0.625 |
| Model3 | 0.07(-0.2,0.34) | 0.606 |  | 0.17(-0.2,0.54) | 0.369 |  | -0.08(-0.46,0.3) | 0.674 |
| **Monocyte/Macrophage count, 10^9/L** |  |  |  |  |  |  |  |  |
| Model1 | -0.26(-0.53,0.01) | 0.060 |  | -0.31(-0.69,0.07) | 0.112 |  | -0.16(-0.55,0.22) | 0.407 |
| Model2 | -0.29(-0.56,-0.02) | 0.037 |  | -0.35(-0.73,0.03) | 0.069 |  | -0.21(-0.59,0.17) | 0.283 |
| Model3 | -0.28(-0.54,-0.01) | 0.040 |  | -0.43(-0.8,-0.06) | 0.022 |  | -0.14(-0.52,0.24) | 0.462 |
| **Neutrophil count, 10^9/L** |  |  |  |  |  |  |  |  |
| Model1 | 0.19(-0.09,0.46) | 0.184 |  | 0.28(-0.12,0.68) | 0.169 |  | 0.11(-0.27,0.48) | 0.577 |
| Model2 | 0.1(-0.17,0.37) | 0.476 |  | 0.22(-0.17,0.62) | 0.269 |  | -0.04(-0.41,0.33) | 0.846 |
| Model3 | 0.02(-0.25,0.28) | 0.909 |  | 0.07(-0.32,0.45) | 0.741 |  | -0.07(-0.44,0.3) | 0.704 |
| **Lymphocyte-Monocyte/macrophage ratio** |  |  |  |  |  |  |  |  |
| Model1 | 0.21(-0.06,0.48) | 0.126 |  | 0.31(-0.07,0.69) | 0.112 |  | 0.07(-0.3,0.45) | 0.709 |
| Model2 | 0.26(-0.01,0.53) | 0.055 |  | 0.36(-0.02,0.74) | 0.063 |  | 0.15(-0.22,0.52) | 0.433 |
| Model3 | 0.26(0,0.52) | 0.048 |  | 0.42(0.05,0.79) | 0.026 |  | 0.12(-0.25,0.48) | 0.538 |
| **Neutrophil/lymphocyte ratio** |  |  |  |  |  |  |  |  |
| Model1 | 0.14(-0.13,0.41) | 0.324 |  | 0.13(-0.26,0.51) | 0.520 |  | 0.14(-0.23,0.52) | 0.461 |
| Model2 | 0.05(-0.22,0.31) | 0.727 |  | 0.06(-0.32,0.45) | 0.742 |  | 0.03(-0.34,0.4) | 0.880 |
| Model3 | 0(-0.27,0.26) | 0.978 |  | -0.01(-0.39,0.36) | 0.943 |  | 0(-0.37,0.36) | 0.985 |
| ***Mean arterial pressure, mmHg*** |  |  |  |  |  |  |  |  |
| **White blood cell count, 10^9/L** |  |  |  |  |  |  |  |  |
| Model1 | 0.3(0.03,0.57) | 0.032 |  | 0.45(0.06,0.84) | 0.023 |  | 0.13(-0.25,0.52) | 0.495 |
| Model2 | 0.18(-0.09,0.44) | 0.186 |  | 0.37(-0.01,0.75) | 0.054 |  | -0.04(-0.4,0.33) | 0.847 |
| Model3 | 0.07(-0.18,0.32) | 0.585 |  | 0.16(-0.2,0.52) | 0.381 |  | -0.07(-0.42,0.29) | 0.716 |
| **Lymphocyte percentage, %** |  |  |  |  |  |  |  |  |
| Model1 | -0.21(-0.49,0.06) | 0.126 |  | -0.21(-0.61,0.18) | 0.289 |  | -0.22(-0.6,0.16) | 0.252 |
| Model2 | -0.08(-0.35,0.18) | 0.546 |  | -0.1(-0.49,0.28) | 0.598 |  | -0.06(-0.42,0.3) | 0.746 |
| Model3 | 0(-0.25,0.25) | 0.989 |  | 0(-0.36,0.36) | 0.986 |  | 0(-0.35,0.36) | 0.978 |
| **Monocyte/Macrophage percentage, %** |  |  |  |  |  |  |  |  |
| Model1 | -0.43(-0.71,-0.16) | 0.002 |  | -0.61(-0.99,-0.24) | 0.001 |  | -0.22(-0.62,0.18) | 0.277 |
| Model2 | -0.42(-0.68,-0.16) | 0.002 |  | -0.63(-0.99,-0.26) | 0.001 |  | -0.16(-0.54,0.22) | 0.416 |
| Model3 | -0.38(-0.63,-0.13) | 0.003 |  | -0.61(-0.95,-0.27) | <0.001 |  | -0.1(-0.46,0.27) | 0.611 |
| **Lymphocyte count, 10^9/L** |  |  |  |  |  |  |  |  |
| Model1 | 0.08(-0.2,0.36) | 0.578 |  | 0.22(-0.17,0.61) | 0.269 |  | -0.09(-0.49,0.31) | 0.655 |
| Model2 | 0.1(-0.17,0.37) | 0.452 |  | 0.27(-0.11,0.65) | 0.165 |  | -0.09(-0.47,0.29) | 0.648 |
| Model3 | 0.07(-0.19,0.33) | 0.587 |  | 0.16(-0.19,0.52) | 0.372 |  | -0.07(-0.44,0.3) | 0.725 |
| **Monocyte/Macrophage count, 10^9/L** |  |  |  |  |  |  |  |  |
| Model1 | -0.24(-0.52,0.03) | 0.085 |  | -0.3(-0.69,0.08) | 0.122 |  | -0.19(-0.58,0.21) | 0.354 |
| Model2 | -0.31(-0.58,-0.05) | 0.020 |  | -0.37(-0.74,0.01) | 0.056 |  | -0.25(-0.63,0.12) | 0.191 |
| Model3 | -0.3(-0.55,-0.05) | 0.021 |  | -0.46(-0.81,-0.11) | 0.010 |  | -0.15(-0.52,0.22) | 0.428 |
| **Neutrophil count, 10^9/L** |  |  |  |  |  |  |  |  |
| Model1 | 0.34(0.06,0.62) | 0.017 |  | 0.45(0.05,0.86) | 0.028 |  | 0.23(-0.16,0.61) | 0.245 |
| Model2 | 0.17(-0.1,0.43) | 0.228 |  | 0.32(-0.07,0.71) | 0.110 |  | 0(-0.36,0.37) | 0.981 |
| Model3 | 0.05(-0.21,0.31) | 0.694 |  | 0.12(-0.25,0.49) | 0.523 |  | -0.05(-0.41,0.31) | 0.788 |
| **Lymphocyte-Monocyte/macrophage ratio** |  |  |  |  |  |  |  |  |
| Model1 | 0.2(-0.07,0.47) | 0.148 |  | 0.31(-0.08,0.69) | 0.119 |  | 0.09(-0.29,0.47) | 0.635 |
| Model2 | 0.3(0.04,0.57) | 0.023 |  | 0.39(0.02,0.76) | 0.041 |  | 0.21(-0.16,0.57) | 0.269 |
| Model3 | 0.31(0.06,0.56) | 0.016 |  | 0.46(0.11,0.81) | 0.010 |  | 0.16(-0.2,0.51) | 0.390 |
| **Neutrophil/lymphocyte ratio** |  |  |  |  |  |  |  |  |
| Model1 | 0.21(-0.07,0.48) | 0.139 |  | 0.23(-0.16,0.62) | 0.251 |  | 0.19(-0.19,0.57) | 0.329 |
| Model2 | 0.06(-0.21,0.32) | 0.675 |  | 0.09(-0.29,0.47) | 0.636 |  | 0.02(-0.34,0.38) | 0.913 |
| Model3 | -0.01(-0.27,0.24) | 0.919 |  | -0.01(-0.36,0.35) | 0.968 |  | -0.03(-0.38,0.33) | 0.873 |
| Model1:Unadjusted | | | | | | | | |
| Model2:Adjusted for age , height , sex | | | | | | | | |
| Model3:Adjusted for age , height , sex , body mass index , maternal obesity | | | | | | | | |
