# Supplementary material for: The Relationship Between White Blood Cell Counts and Pediatric Hypertension: A Prospective Cohort Study
Source: Research Square preprint supplement (doi:10.21203/rs.3.rs-7484387/v1), 2025-10-01
Supplement: Supplementary file 6 [file d73e112fa238e00832a76e22.docx]

| **Table 4. The increased risk of the variables (by quartile increase) on the incidence of prehypertension and hypertension for a cohort study** | | | | | | | | |
| --- | --- | --- | --- | --- | --- | --- | --- | --- |
| **Variables** | **Overall** | |  | **Male** | |  | **Female** | |
|  | **OR(95%CIs)** | **P** |  | **OR(95%CIs)** | **P** |  | **OR(95%CIs)** | **P** |
| **White blood cell count, 10^9/L** |  |  |  |  |  |  |  |  |
| Model1 | 1.03(0.92,1.15) | 0.660 |  | 1.14(0.96,1.35) | 0.142 |  | 0.94(0.81,1.08) | 0.369 |
| Model2 | 1.03(0.9,1.18) | 0.652 |  | 1.16(0.95,1.41) | 0.142 |  | 0.91(0.76,1.09) | 0.323 |
| Model3 | 1(0.87,1.13) | 0.946 |  | 1.07(0.89,1.3) | 0.443 |  | 0.9(0.75,1.08) | 0.271 |
| **Lymphocyte percentage, %** |  |  |  |  |  |  |  |  |
| Model1 | 0.98(0.87,1.1) | 0.731 |  | 0.98(0.82,1.17) | 0.837 |  | 0.98(0.85,1.13) | 0.774 |
| Model2 | 0.99(0.87,1.13) | 0.882 |  | 0.98(0.8,1.2) | 0.867 |  | 1(0.83,1.2) | 0.991 |
| Model3 | 1.01(0.89,1.16) | 0.832 |  | 1.02(0.85,1.24) | 0.817 |  | 1.02(0.85,1.23) | 0.841 |
| **Monocyte/Macrophage percentage, %** |  |  |  |  |  |  |  |  |
| Model1 | 0.82(0.73,0.92) | 0.001 |  | 0.8(0.68,0.95) | 0.010 |  | 0.84(0.72,0.98) | 0.026 |
| Model2 | 0.76(0.66,0.87) | <0.001 |  | 0.76(0.62,0.91) | 0.004 |  | 0.77(0.63,0.93) | 0.006 |
| Model3 | 0.78(0.68,0.88) | <0.001 |  | 0.77(0.64,0.92) | 0.004 |  | 0.78(0.64,0.95) | 0.012 |
| **Lymphocyte count, 10^9/L** |  |  |  |  |  |  |  |  |
| Model1 | 1.02(0.91,1.14) | 0.770 |  | 1.1(0.93,1.32) | 0.264 |  | 0.94(0.81,1.1) | 0.464 |
| Model2 | 1.03(0.9,1.18) | 0.635 |  | 1.12(0.92,1.37) | 0.257 |  | 0.95(0.79,1.15) | 0.588 |
| Model3 | 1.01(0.89,1.16) | 0.862 |  | 1.06(0.88,1.29) | 0.513 |  | 0.95(0.78,1.15) | 0.592 |
| **Monocyte/Macrophage count, 10^9/L** |  |  |  |  |  |  |  |  |
| Model1 | 0.83(0.73,0.93) | 0.001 |  | 0.85(0.71,1.01) | 0.059 |  | 0.81(0.69,0.95) | 0.010 |
| Model2 | 0.78(0.68,0.89) | <0.001 |  | 0.8(0.65,0.97) | 0.028 |  | 0.76(0.62,0.92) | 0.006 |
| Model3 | 0.79(0.68,0.90) | <0.001 |  | 0.77(0.64,0.93) | 0.008 |  | 0.79(0.64,0.95) | 0.017 |
| **Neutrophil count, 10^9/L** |  |  |  |  |  |  |  |  |
| Model1 | 1.01(0.9,1.13) | 0.854 |  | 1.05(0.88,1.26) | 0.577 |  | 0.98(0.84,1.13) | 0.771 |
| Model2 | 1.01(0.88,1.16) | 0.888 |  | 1.06(0.87,1.3) | 0.548 |  | 0.95(0.79,1.14) | 0.601 |
| Model3 | 0.97(0.85,1.11) | 0.696 |  | 0.99(0.82,1.2) | 0.936 |  | 0.94(0.77,1.13) | 0.488 |
| **Lymphocyte-Monocyte/macrophage ratio** |  |  |  |  |  |  |  |  |
| Model1 | 1.23(1.10,1.39) | <0.001 |  | 1.25(1.06,1.5) | 0.011 |  | 1.21(1.04,1.41) | 0.013 |
| Model2 | 1.32(1.15,1.51) | <0.001 |  | 1.33(1.1,1.63) | 0.005 |  | 1.3(1.09,1.58) | 0.005 |
| Model3 | 1.31(1.15,1.50) | <0.001 |  | 1.34(1.12,1.63) | 0.002 |  | 1.29(1.07,1.57) | 0.009 |
| **Neutrophil/lymphocyte ratio** |  |  |  |  |  |  |  |  |
| Model1 | 1(0.9,1.12) | 0.948 |  | 0.99(0.83,1.18) | 0.944 |  | 1.01(0.87,1.17) | 0.892 |
| Model2 | 0.99(0.86,1.13) | 0.871 |  | 0.99(0.81,1.2) | 0.891 |  | 0.99(0.82,1.18) | 0.883 |
| Model3 | 0.97(0.85,1.11) | 0.651 |  | 0.95(0.79,1.15) | 0.624 |  | 0.97(0.81,1.17) | 0.787 |
| Model1:Unadjusted | | | | | | | | |
| Model2:Adjusted for age , height , sex | | | | | | | | |
| Model3:Adjusted for age , height , sex , body mass index , maternal obesity | | | | | | | | |
