# Supplementary material for: The Relationship Between White Blood Cell Counts and Pediatric Hypertension: A Prospective Cohort Study
Source: Research Square preprint supplement (doi:10.21203/rs.3.rs-7484387/v1), 2025-10-01
Supplement: Supplementary file 7 [file e94387a10d4b651e0fea2463.docx]

| **Table 1. The baseline characteristics of participants for a cohort study［±s，n(%)］** | | | | |
| --- | --- | --- | --- | --- |
| **Variables** | **Overall** | **Male** | **Female** | **P** |
| Sample size, n | 5971 | 3129 | 2842 |  |
| Age, years | 9.11±1.77 | 9.18±1.78 | 9.04±1.75 | 0.003 |
| Height, cm | 134.91±11.62 | 135.38±11.28 | 134.40±11.97 | <0.001 |
| Weight, kg | 33.17±10.44 | 34.22±10.67 | 32.02±10.06 | <0.001 |
| Waist circumference, cm | 59.72±9.49 | 61.24±9.95 | 58.05±8.65 | <0.001 |
| Body mass index, kg/m2 | 17.85±3.49 | 18.29±3.58 | 17.35±3.31 | <0.001 |
| Systolic blood pressure, mmHg | 103.54±10.21 | 104.49±10.19 | 102.49±10.13 | <0.001 |
| Diastolic blood pressure, mmHg | 63.32±7.68 | 63.19±7.72 | 63.46±7.63 | 0.220 |
| Mean arterial pressure, mmHg | 76.72±7.80 | 76.96±7.83 | 76.47±7.75 | 0.008 |
| Heart rate, n/min | 95.49±12.82 | 94.36±12.65 | 96.73±12.90 | <0.001 |
| Glucose (blood sugar), mmol/L | 4.14±0.62 | 4.19±0.62 | 4.08±0.61 | <0.001 |
| Total cholesterol, mmol/L | 3.50±0.66 | 3.49±0.66 | 3.50±0.66 | 0.341 |
| Triglyceride, mmol/L | 0.97±0.58 | 0.97±0.61 | 0.98±0.54 | <0.001 |
| High-density lipoprotein cholesterol, mmol/L | 1.22±0.27 | 1.23±0.28 | 1.22±0.27 | 0.63 |
| Low-density lipoprotein cholesterol, mmol/L | 1.73±0.55 | 1.72±0.57 | 1.73±0.52 | 0.088 |
| Red blood cell count, 10^12/L | 4.59±0.39 | 4.64±0.39 | 4.54±0.39 | <0.001 |
| Hemoglobin, g/L | 126.42±9.98 | 126.87±10.17 | 125.92±9.74 | <0.001 |
| Hematocrit | 37.66±3.11 | 37.77±3.14 | 37.54±3.06 | 0.024 |
| Mean corpuscular volume, f/L | 81.91±6.44 | 81.29±6.47 | 82.59±6.34 | <0.001 |
| Mean corpuscular hemoglobin, pg | 27.65±1.95 | 27.48±1.89 | 27.83±1.99 | <0.001 |
| Mean corpuscular hemoglobin concentration, g/L | 336.58±14.98 | 336.96±14.79 | 336.17±15.18 | 0.037 |
| Platelet count, 10^9/L | 287.48±67.49 | 290.82±67.41 | 283.81±67.40 | <0.001 |
| Red blood cell distribution width-SD, fL | 34.59±4.82 | 34.45±4.86 | 34.74±4.77 | 0.004 |
| Platelet distribution width, fL | 13.47±2.37 | 13.45±2.34 | 13.48±2.40 | 0.82 |
| Mean platelet volume, fL | 10.68±1.30 | 10.67±1.29 | 10.68±1.32 | 0.822 |
| Large platelet ratio | 32.66±8.65 | 32.62±8.53 | 32.71±8.79 | 0.988 |
| White blood cell count, 10^9/L | 7.12±1.79 | 7.22±1.83 | 7.02±1.74 | <0.001 |
| Lymphocyte percentage, % | 36.11±8.25 | 35.97±8.04 | 36.26±8.47 | 0.561 |
| Monocyte/macrophage percentage, % | 7.05±2.75 | 7.25±2.80 | 6.82±2.68 | <0.001 |
| Lymphocyte count, 10^9/L | 2.52±0.66 | 2.55±0.67 | 2.49±0.66 | <0.001 |
| Monocyte/macrophage count, 10^9/L | 0.51±0.34 | 0.53±0.35 | 0.49±0.32 | <0.001 |
| Neutrophil count, 10^9/L | 4.08±1.49 | 4.12±1.51 | 4.03±1.47 | 0.021 |
| Lymphocyte-monocyte/macrophage ratio | 6.11±3.60 | 5.88±3.42 | 6.36±3.76 | <0.001 |
| Neutrophil/lymphocyte ratio | 1.70±0.82 | 1.71±0.84 | 1.70±0.80 | 0.636 |
| Platelet count/lymphocyte count | 120.41±39.02 | 120.63±39.05 | 120.18±38.99 | 0.853 |
| Region, n(%) |  |  |  | 0.040 |
| Urban | 4,761(79.74) | 2,463(78.72) | 2,298(80.86) |  |
| Rural | 1,210(20.26) | 666(21.28) | 544(19.14) |  |
| Hypertension, n(%) |  |  |  | 0.899 |
| No | 5,195(87.00) | 2,724(87.06) | 2,471(86.95) |  |
| Yes | 776(13.00) | 405(12.94) | 371(13.05) |  |
| Obesity, n(%) |  |  |  | <0.001 |
| No | 5,181(86.77) | 2,557(81.72) | 2,624(92.33) |  |
| Yes | 790(13.23) | 572(18.28) | 218(7.67) |  |
| Education, n(%) |  |  |  | 0.719 |
| bachelor degree | 698(12.07) | 357(11.85) | 341(12.30) |  |
| Graduate degree | 60(1.04) | 31(1.03) | 29(1.05) |  |
| Secondary school degree or below | 2,444(42.25) | 1,294(42.96) | 1,150(41.47) |  |
| Technical secondary school/ junior college degree | 2,583(44.65) | 1,330(44.16) | 1,253(45.19) |  |
| Father’s occupation, n(%) |  |  |  | 0.413 |
| Manager | 409(7.05) | 216(7.16) | 193(6.93) |  |
| Worker | 1,758(30.32) | 931(30.87) | 827(29.72) |  |
| Technicist/Researcher | 339(5.85) | 160(5.31) | 179(6.43) |  |
| Farmer | 1,790(30.87) | 932(30.90) | 858(30.83) |  |
| Others | 1,503(25.92) | 777(25.76) | 726(26.09) |  |
| Mother’s occupation, n(%) |  |  |  | 0.868 |
| Manager | 255(4.37) | 139(4.57) | 116(4.15) |  |
| Worker | 1,630(27.93) | 835(27.45) | 795(28.44) |  |
| Technicist/Researcher | 120(2.06) | 64(2.10) | 56(2.00) |  |
| Farmer | 1,849(31.68) | 970(31.89) | 879(31.45) |  |
| Others | 1,983(33.97) | 1,034(33.99) | 949(33.95) |  |
| Father with obesity, n(%) |  |  |  | 0.967 |
| No | 3,894(82.17) | 2,020(82.15) | 1,874(82.19) |  |
| Yes | 845(17.83) | 439(17.85) | 406(17.81) |  |
| Maternal obesity, n(%) |  |  |  | 0.042 |
| No | 4,226(89.14) | 2,211(90.02) | 2,015(88.18) |  |
| Yes | 515(10.86) | 245(9.98) | 270(11.82) |  |
| Gestational diabetes, n(%) |  |  |  | 0.051 |
| No | 4,646(99.13) | 2,409(99.38) | 2,237(98.85) |  |
| Yes | 41(0.07) | 15(0.62) | 26(1.15) |  |
| Hypertension of pregnancy, n(%) |  |  |  | 0.989 |
| No | 4,588(98.85) | 2,369(98.75) | 2,219(98.75) |  |
| Yes | 58(1.15) | 30(1.25) | 28(1.25) |  |
| Income, n(%) |  |  |  | 0.305 |
| ~500yuan | 177(3.73) | 89(3.62) | 88(3.84) |  |
| ~1000yuan | 353(7.43) | 180(7.33) | 173(7.54) |  |
| ~2000yuan | 771(16.23) | 407(16.56) | 364(15.87) |  |
| ~3000yuan | 1,098(23.11) | 595(24.22) | 503(21.93) |  |
| >3000yuan | 2,352(49.51) | 1,186(48.27) | 1,166(50.83) |  |
